# Supplementary material
Source: PubMed Central journal article supplement (PMC4696440)
Supplement: Supp_Table1.pdf [file Supp_Table1.pdf]

## Supplementary Data

SUPPLEMENTARY TABLE 1. QUESTIONS INCLUDED IN BEMT SURVEY

| <i>Section</i>                   | <i>Questions</i>                                                                                                                                                                                                                                                                                                                                                                                                                                                                                                                                                                                                                                                                                                                                                                                                                                                                                                                                                                                                                                                                                                             |
|----------------------------------|------------------------------------------------------------------------------------------------------------------------------------------------------------------------------------------------------------------------------------------------------------------------------------------------------------------------------------------------------------------------------------------------------------------------------------------------------------------------------------------------------------------------------------------------------------------------------------------------------------------------------------------------------------------------------------------------------------------------------------------------------------------------------------------------------------------------------------------------------------------------------------------------------------------------------------------------------------------------------------------------------------------------------------------------------------------------------------------------------------------------------|
| Biobank demographics             | <ul style="list-style-type: none"> <li>• Name</li> <li>• Title</li> <li>• Institution name</li> <li>• Institution type</li> <li>• Biobank name</li> <li>• What is the number of years your biobank has been in operation?</li> <li>• In what Country is your biobank headquarters located?</li> <li>• In what Geographic region is your biobank headquarters located?</li> <li>• Are your biobank operations international?</li> <li>• What is your biobank's operational model?</li> <li>• How many operating sites does your biobank have?</li> <li>• What is the total estimated size of your biobank facility?</li> </ul>                                                                                                                                                                                                                                                                                                                                                                                                                                                                                                |
| Cost recovery and funding        | <ul style="list-style-type: none"> <li>• Does your biobank practice cost recovery?</li> <li>• Approximately what percentage (%) of your biobank operations are recovered from provision of specimens, products and/or services?</li> <li>• What is the percent contribution of each type of funds below to the overall funds brought in annually to the biobank?</li> <li>• Of fees recovered annually by the biobank, what percentage is contributed by each of the entities below?</li> <li>• Approximately how much (USD) (in total) did your biobank spend on "big-ticket" item expenditures at start-up?</li> <li>• Approximately how much (USD) (for each) did your biobank spend on "big-ticket" item expenditures at start-up?</li> <li>• Approximately, how much (USD) is your total annual operational budget for operational expenditures?</li> <li>• Approximately how much (USD) does your biobank spend annually on the following operational expenditures?</li> <li>• Approximately what percentage of your time do you allocate annually to performing the following activities for your biobank?</li> </ul> |
| Cost and pricing                 | <ul style="list-style-type: none"> <li>• Estimated annualized salary range, fringe benefit percentage (%), and number of FTE's for employees your biobank supports</li> <li>• What type of capital equipment do you have to support specimen collection and processing?</li> <li>• What type of capital equipment do you have to support sample management and storage?</li> <li>• What type of capital equipment do you have to support specimen quality control and sample analysis? <ul style="list-style-type: none"> <li>- How many do you have of each piece of equipment?</li> <li>- Is equipment purchased or leased?</li> <li>- Estimated average annual lease/purchase price of equipment</li> <li>- How many years to you plan to keep the equipment bought or leased?</li> <li>- Estimated annual service contract price (if applicable) per unit</li> </ul> </li> </ul>                                                                                                                                                                                                                                         |
| Specimens, products and services | <ul style="list-style-type: none"> <li>• Details about specimens and products biobank offers to customers</li> <li>• Types of services and pricing</li> <li>• Approximate % mark-up for specimens/products and services</li> <li>• Approximate % mark-up for overhead to external parties (who use and collaborate with biobank)</li> </ul>                                                                                                                                                                                                                                                                                                                                                                                                                                                                                                                                                                                                                                                                                                                                                                                  |
| Additional questions             | <ul style="list-style-type: none"> <li>• What best practice guidelines does your biobank practice?</li> </ul>                                                                                                                                                                                                                                                                                                                                                                                                                                                                                                                                                                                                                                                                                                                                                                                                                                                                                                                                                                                                                |
